# Supplementary material for: Antisense RNA associated with biological regulation of a restriction–modification system
Source: PubMed Central journal article supplement — Nucleic Acids Res. 2011 Mar 31;39(13):5622–32. doi: 10.1093/nar/gkr166 (PMC3141266; doi:10.1093/nar/gkr166), 2011-03-31
Supplement: supp_gkr166_supplement_5_1.pdf [file supp_gkr166_supplement_5_1.pdf]

## Antisense RNA associated with biological regulation of a restriction-modification system

Running title: Restriction modification and RNA

Key words: small RNA/ transcription/ antisense RNA/ EcoRI/ post-segregational killing/ transcriptional interference

Iwona Mruk<sup>1,2,#</sup>, Yaoping Liu<sup>2,3,#</sup>, Liying Ge<sup>2</sup> and Ichizo Kobayashi<sup>2,3,4\*</sup>

<sup>1</sup>Department of Microbiology, University of Gdansk, Kladki 24, Gdansk, 80-822, Poland

<sup>2</sup>Department of Medical Genome Sciences, Graduate School of Frontier Sciences, University of Tokyo, Tokyo 108-8639, Japan

<sup>3</sup>Institute of Medical Science, University of Tokyo, Tokyo 108-8639, Japan

<sup>4</sup>Graduate Program in Biophysics and Biochemistry, Graduate School of Science, University of Tokyo, Japan

TABLE S1. Primers and probes

| <i>Primer</i> | <i>Oligonucleotide sequence (5'→3')</i> | <i>Used for</i>              |
|---------------|-----------------------------------------|------------------------------|
| 944f          | AACGATATCTAGAGGTGCGTACAATTAAG           | <i>lacZ</i> fusions, cloning |
| 982f          | AATCTAGAGACATATGTAAC                    |                              |
| 1536f         | TGCTCTAGATCCTTTTCTTAGAGGGTCT            |                              |
| 1588f         | AATATCTAGACCAGATGGAAGGG                 |                              |
| 1588bf        | AATATCTAGACCAGAGGGATGGGAAGTTAATCTTGAG   |                              |
| 1629f         | ATTGATATCTAGAAAATAGGTTAGATCGAC          |                              |
| 1640r         | ACCAGAATTATACTCAAG                      |                              |
| 1662f         | CTGTCTAGAATTATGGAATGCCTA                |                              |
| 1675f         | CGGAATGTCTAGAAATAGTAATCTATGTA           |                              |
| 1692r         | CTAAAGCTTGGATATCCATAATTAGCTGCA          |                              |
| 1731r         | TTGTCTAGAAAGCTTACAAATTTGTTAATAC         |                              |
| 1800r         | ATGAAGCTTGCATGCCACTCCCTCCCATC           |                              |
| 1801r         | ATGTCTAGAGCATGCCACTCCCTCCCATC           |                              |
| 1892r         | CGAATCTAGATCACTTAGATGTAAGCTG            |                              |

|                  |                                                                 |                                 |
|------------------|-----------------------------------------------------------------|---------------------------------|
| Mr               | AAGCTCTAGACGAAGCTAATGATCTC                                      | pIMRM cloning                   |
| Rf               | CGGTCTAGAGTGGTCGACACCATCTGGTTGC                                 |                                 |
| lacc             | CGGGATCGATCACAGAAGAAGTAGT                                       | primer extension                |
| 1128f            | ATGCCCATGGTCTAGATCTCGCTGTTGGTG                                  | northern blotting               |
| 1601r            | CATACGATTTAGGTGACACTATAGAATACTGGTCTTGTTATTGA                    |                                 |
| 1536f            | TGCTCTAGATCCTTTTCTTAGAGGGGTCT                                   |                                 |
| 1748r            | CATACGATTTAGGTGACACTATAGAATACTGCATGCCAAATTTGTTAATACATAG         |                                 |
| 1536f            | TGCTCTAGATCCTTTTCTTAGAGGGGTCT                                   | RNase protection assay          |
| 1800r            | ATGAAGCTTGCATGCCACTCCCTCCCATC                                   |                                 |
| 1425f            | TCCTCGTGCGGCCAAGAGGAGATCAAGATTTA                                |                                 |
| 1634r            | CAGATCTAGACTAAAGATTAACAACCCTTC                                  |                                 |
| colef            | GCGGTGACATATGCGGTGCTACAGAGTTC                                   |                                 |
| coler            | TGAGTCGACGATATCGTAGAAAAGATCAAAG                                 |                                 |
| loading control  | ATCTAGATAAATGTGAGCGGATAACATTGACATTGTGAGCGGATAAC AAGATACTGAGCATG |                                 |
| PREV0-10mutf     | TTGTAACCCGGGAAGACAAAAGCATTCTGCT                                 | $P_{\text{REV0}}$ substitutions |
| PREV0-10mutr     | TTGTCTTCCCGGGTTACAAATTTGTTAATAC                                 |                                 |
| PREV0-35upmutf1  | ACAAAAGCATTATGTGTCAAGCAGCATCTATAT                               |                                 |
| PREV0-35upmutr1  | TTGACACATAATGCTTTTGTCTTTATGA                                    |                                 |
| PREV0-35upmutf2  | AAGCATTATGTTACAAGCAGCATCTATAT                                   |                                 |
| PREV0-35upmutr3  | TGCTTGTAACATAATGCTTTTGTCTTTAT                                   |                                 |
| PREV0-35mutf     | ACAAAAGCATTATGGGGCAAGCAGCATCTATAT                               |                                 |
| PREV0-35mutr     | TTGCCCCATAATGCTTTTGTCTTTATGA                                    |                                 |
| PREV0-35downmutf | ATTATGCTAGCCGCAGCATCTATATATAC                                   |                                 |
| PREV0-35downmutr | GATGCTGCGGCTAGCATAATGCTTTTGTCT                                  |                                 |
| PM1/M2-10mutf    | GCGGTCTGGTAAAGCAAATAGGTTAGATCGACTAAC                            | $P_{\text{M1,2}}$ substitutions |
| PM1/M2-10mutr    | ATTTGCTTTACCAGACCGCTACTCAAGATTAACAAC                            |                                 |
| sRNAmutf         | GCCCATCAACAGTAACCTATGTATTAACAAT                                 | making pIM24                    |
| sRNAmutr         | TAGGTTACTGTTGATGGGCATTCCATAATTAG                                |                                 |

**Figure S1.** Predicted secondary structure for the antisense RNA (Rna0).

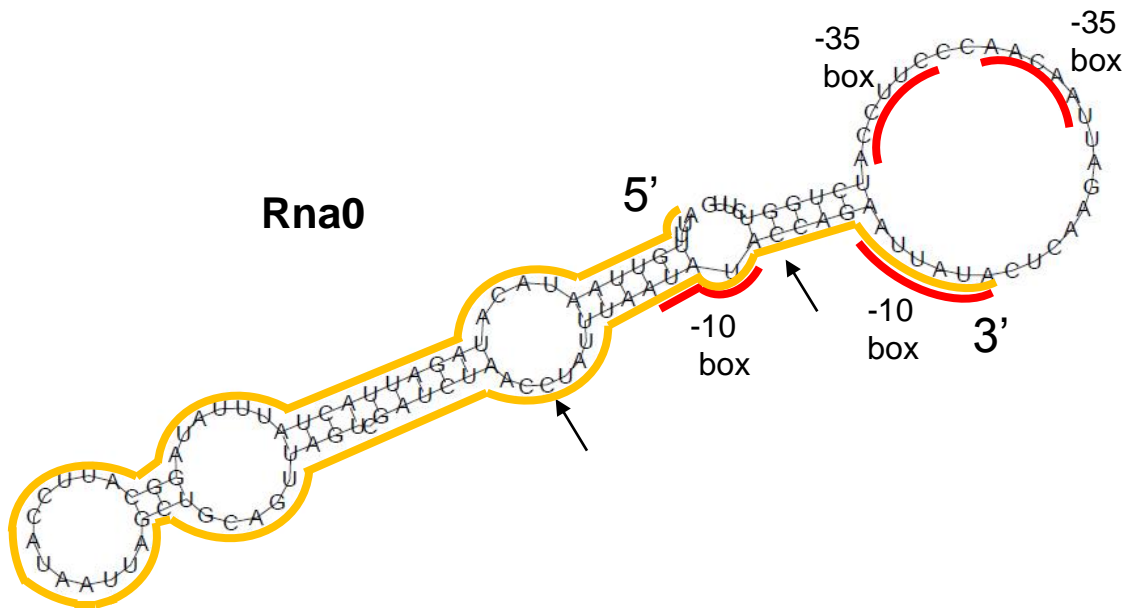

This was generated by RNAfold (<http://rna.tbi.univie.ac.at/cgi-bin/RNAfold.cgi>).

The optimal RNA fold was generated with a minimum free energy of **-14.79** kcal/mol.

Rna0 is indicated by a yellow line with its 5' and 3' end. Complementary sequences corresponding to -10 and -35 hexamers for promoters P<sub>M1</sub> and P<sub>M2</sub> are indicated by red lines. Two transcription start sites from P<sub>M1</sub> and P<sub>M2</sub> are marked by arrows.

**Figure S2.** Predicted secondary structure for the 5' end of mRNA for modification enzyme initiated from  $P_{M1,M2}$  promoter.

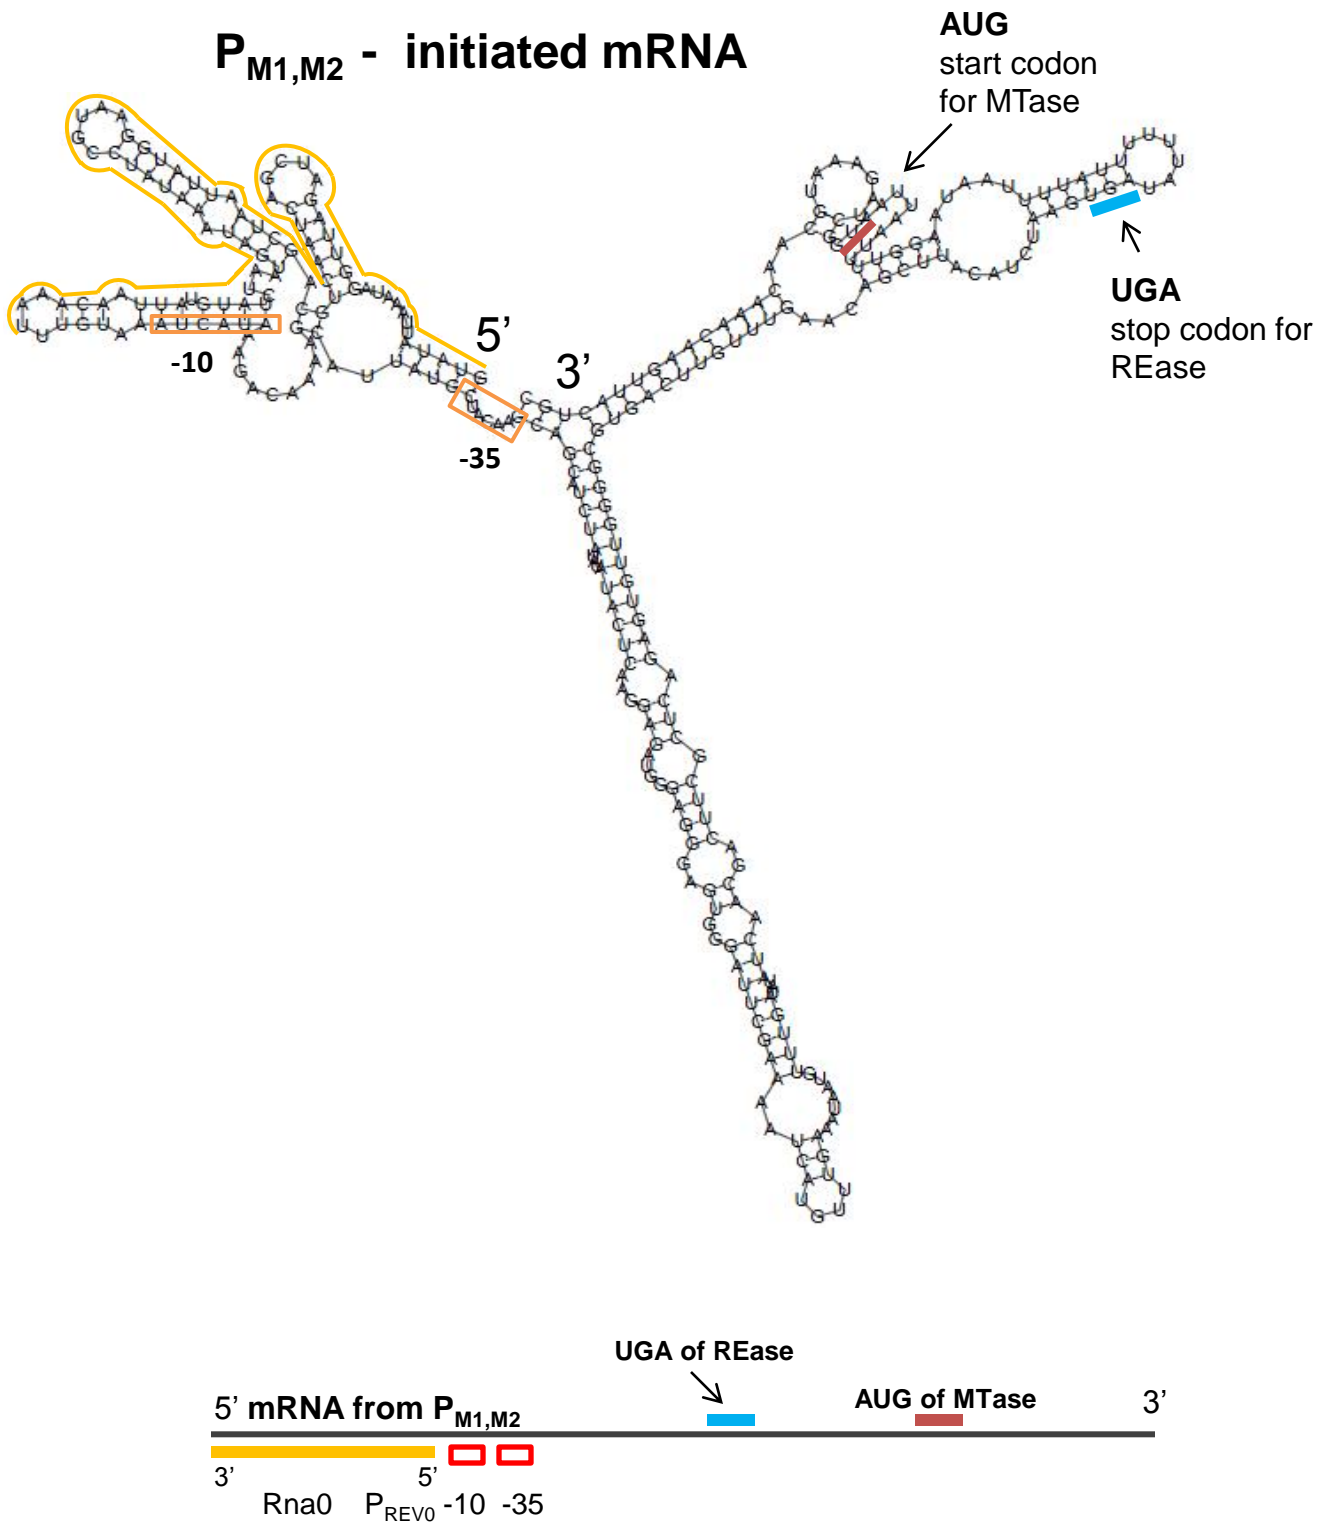

Sequence complementary to the antisense RNA (Rna0) is in yellow, while those corresponding to -10 and -35 hexamers of its (reverse) promoter ( $P_{REV0}$ ) are boxed. Initiation codon, ATG, for translation of the modification enzyme is underlined in red. Stop codon for translation of restriction endonuclease, UGA, is underlined in blue. This structure was generated by RNAfold (<http://rna.tbi.univie.ac.at/cgi-bin/RNAfold.cgi>). The optimal RNA fold was generated with a minimum free energy of **-63.20** kcal/mol.

Bottom: a linear representation.
